# Supplementary material for: Microorganisms Involved in Hydrogen Sink in the Gastrointestinal Tract of Chickens
Source: MDPI journal article supplement (doi:10.3390/ijms24076674), 2023-04-03
Supplement: s1 [file s1]

| Pair of variables                                                     | Source=experimental group<br>The Spearman rho's rank correlation results; $p < 0.05000$ |          |          |
|-----------------------------------------------------------------------|-----------------------------------------------------------------------------------------|----------|----------|
|                                                                       | $R_s$<br>Spearman                                                                       | t(N-2)   | $p$      |
| Methanogenic archaea (log10) & Methanogenic archaea (log10)           |                                                                                         |          |          |
| Methanogenic archaea (log10) & Acetogens (log10)                      |                                                                                         |          |          |
| Methanogenic archaea (log10) & Sulfate-reducing bacteria (log10)      |                                                                                         |          |          |
| Methanogenic archaea (log10) & Hydrogenase utilizers (log10)          |                                                                                         |          |          |
| Methanogenic archaea (log10) & <i>L. salivarius</i> (log10)           |                                                                                         |          |          |
| Methanogenic archaea (log10) & <i>C. jejuni</i> (log10)               |                                                                                         |          |          |
| Acetogens (log10) & Methanogenic archaea (log10)                      |                                                                                         |          |          |
| Acetogens (log10) & Acetogens (log10)                                 |                                                                                         |          |          |
| Acetogens (log10) & Sulfate-reducing bacteria (log10)                 |                                                                                         |          |          |
| Acetogens (log10) & Hydrogenase utilizers (log10)                     | -0.032453                                                                               | -0.23414 | 0.815794 |
| Acetogens (log10) & <i>L. salivarius</i> (log10)                      | 0.188607                                                                                | 1.38492  | 0.171991 |
| Acetogens (log10) & <i>C. jejuni</i> (log10)                          | 0.189484                                                                                | 1.39160  | 0.169969 |
| Sulfate-reducing bacteria (log10) & Methanogenic archaea (log10)      |                                                                                         |          |          |
| Sulfate-reducing bacteria (log10) & Acetogens (log10)                 |                                                                                         |          |          |
| Sulfate-reducing bacteria (log10) & Sulfate-reducing bacteria (log10) |                                                                                         |          |          |
| Sulfate-reducing bacteria (log10) & Hydrogenase utilizers (log10)     |                                                                                         |          |          |
| Sulfate-reducing bacteria (log10) & <i>L. salivarius</i> (log10)      |                                                                                         |          |          |
| Sulfate-reducing bacteria (log10) & <i>C. jejuni</i> (log10)          |                                                                                         |          |          |
| Hydrogenase utilizers (log10) & Methanogenic archaea (log10)          |                                                                                         |          |          |
| Hydrogenase utilizers (log10) & Acetogens (log10)                     | -0.032453                                                                               | -0.23414 | 0.815794 |
| Hydrogenase utilizers (log10) & Sulfate-reducing bacteria (log10)     |                                                                                         |          |          |
| Hydrogenase utilizers (log10) & Hydrogenase utilizers (log10)         |                                                                                         |          |          |
| Hydrogenase utilizers (log10) & <i>L. salivarius</i> (log10)          | -0.531545                                                                               | -4.52525 | 0.000035 |
| Hydrogenase utilizers (log10) & <i>C. jejuni</i> (log10)              | -0.080068                                                                               | -0.57924 | 0.564930 |
| <i>L. salivarius</i> (log10) & Methanogenic archaea (log10)           |                                                                                         |          |          |
| <i>L. salivarius</i> (log10) & Acetogens (log10)                      | 0.188607                                                                                | 1.38492  | 0.171991 |
| <i>L. salivarius</i> (log10) & Sulfate-reducing bacteria (log10)      |                                                                                         |          |          |
| <i>L. salivarius</i> (log10) & Hydrogenase utilizers (log10)          | -0.531545                                                                               | -4.52525 | 0.000035 |
| <i>L. salivarius</i> (log10) & <i>L. salivarius</i> (log10)           |                                                                                         |          |          |
| <i>L. salivarius</i> (log10) & <i>C. jejuni</i> (log10)               | 0.074914                                                                                | 0.54173  | 0.590317 |
| <i>C. jejuni</i> (log10) & Methanogenic archaea (log10)               |                                                                                         |          |          |
| <i>C. jejuni</i> (log10) & Acetogens (log10)                          | 0.189484                                                                                | 1.39160  | 0.169969 |
| <i>C. jejuni</i> (log10) & Sulfate-reducing bacteria (log10)          |                                                                                         |          |          |
| <i>C. jejuni</i> (log10) & Hydrogenase utilizers (log10)              | -0.080068                                                                               | -0.57924 | 0.564930 |
| <i>C. jejuni</i> (log10) & <i>L. salivarius</i> (log10)               | 0.074914                                                                                | 0.54173  | 0.590317 |
| <i>C. jejuni</i> (log10) & <i>C. jejuni</i> (log10)                   |                                                                                         |          |          |
