# Supplementary material for: Microorganisms Involved in Hydrogen Sink in the Gastrointestinal Tract of Chickens
Source: MDPI journal article supplement (doi:10.3390/ijms24076674), 2023-04-03
Supplement: s1 [file s1]

| Pair of variables                                                     | All chicken groups together<br>The Spearman rho's rank correlation results; $p < 0.05000$ |          |          |
|-----------------------------------------------------------------------|-------------------------------------------------------------------------------------------|----------|----------|
|                                                                       | $R_s$<br>Spearman                                                                         | t(N-2)   | $p$      |
| Methanogenic archaea (log10) & Methanogenic archaea (log10)           |                                                                                           |          |          |
| Methanogenic archaea (log10) & Acetogens (log10)                      | 0.055560                                                                                  | 0.69724  | 0.486686 |
| Methanogenic archaea (log10) & Sulfate-reducing bacteria (log10)      | 0.551535                                                                                  | 8.28472  | 0.000000 |
| Methanogenic archaea (log10) & Hydrogenase utilizers (log10)          | 0.464421                                                                                  | 6.57077  | 0.000000 |
| Methanogenic archaea (log10) & <i>L. salivarius</i> (log10)           | 0.049604                                                                                  | 0.62230  | 0.534646 |
| Methanogenic archaea (log10) & <i>C. jejuni</i> (log10)               | 0.472977                                                                                  | 6.72632  | 0.000000 |
| Acetogens (log10) & Methanogenic archaea (log10)                      | 0.055560                                                                                  | 0.69724  | 0.486686 |
| Acetogens (log10) & Acetogens (log10)                                 |                                                                                           |          |          |
| Acetogens (log10) & Sulfate-reducing bacteria (log10)                 | -0.337500                                                                                 | -4.49245 | 0.000014 |
| Acetogens (log10) & Hydrogenase utilizers (log10)                     | 0.163816                                                                                  | 2.08071  | 0.039084 |
| Acetogens (log10) & <i>L. salivarius</i> (log10)                      | -0.143439                                                                                 | -1.81606 | 0.071268 |
| Acetogens (log10) & <i>C. jejuni</i> (log10)                          | 0.014771                                                                                  | 0.18511  | 0.853386 |
| Sulfate-reducing bacteria (log10) & Methanogenic archaea (log10)      | 0.551535                                                                                  | 8.28472  | 0.000000 |
| Sulfate-reducing bacteria (log10) & Acetogens (log10)                 | -0.337500                                                                                 | -4.49245 | 0.000014 |
| Sulfate-reducing bacteria (log10) & Sulfate-reducing bacteria (log10) |                                                                                           |          |          |
| Sulfate-reducing bacteria (log10) & Hydrogenase utilizers (log10)     | 0.241187                                                                                  | 3.11400  | 0.002194 |
| Sulfate-reducing bacteria (log10) & <i>L. salivarius</i> (log10)      | 0.263881                                                                                  | 3.42791  | 0.000777 |
| Sulfate-reducing bacteria (log10) & <i>C. jejuni</i> (log10)          | 0.431407                                                                                  | 5.99177  | 0.000000 |
| Hydrogenase utilizers (log10) & Methanogenic archaea (log10)          | 0.464421                                                                                  | 6.57077  | 0.000000 |
| Hydrogenase utilizers (log10) & Acetogens (log10)                     | 0.163816                                                                                  | 2.08071  | 0.039084 |
| Hydrogenase utilizers (log10) & Sulfate-reducing bacteria (log10)     | 0.241187                                                                                  | 3.11400  | 0.002194 |
| Hydrogenase utilizers (log10) & Hydrogenase utilizers (log10)         |                                                                                           |          |          |
| Hydrogenase utilizers (log10) & <i>L. salivarius</i> (log10)          | -0.183165                                                                                 | -2.33455 | 0.020833 |
| Hydrogenase utilizers (log10) & <i>C. jejuni</i> (log10)              | 0.498503                                                                                  | 7.20534  | 0.000000 |
| <i>L. salivarius</i> (log10) & Methanogenic archaea (log10)           | 0.049604                                                                                  | 0.62230  | 0.534646 |
| <i>L. salivarius</i> (log10) & Acetogens (log10)                      | -0.143439                                                                                 | -1.81606 | 0.071268 |
| <i>L. salivarius</i> (log10) & Sulfate-reducing bacteria (log10)      | 0.263881                                                                                  | 3.42791  | 0.000777 |
| <i>L. salivarius</i> (log10) & Hydrogenase utilizers (log10)          | -0.183165                                                                                 | -2.33455 | 0.020833 |
| <i>L. salivarius</i> (log10) & <i>L. salivarius</i> (log10)           |                                                                                           |          |          |
| <i>L. salivarius</i> (log10) & <i>C. jejuni</i> (log10)               | 0.034213                                                                                  | 0.42894  | 0.668552 |
| <i>C. jejuni</i> (log10) & Methanogenic archaea (log10)               | 0.472977                                                                                  | 6.72632  | 0.000000 |
| <i>C. jejuni</i> (log10) & Acetogens (log10)                          | 0.014771                                                                                  | 0.18511  | 0.853386 |
| <i>C. jejuni</i> (log10) & Sulfate-reducing bacteria (log10)          | 0.431407                                                                                  | 5.99177  | 0.000000 |
| <i>C. jejuni</i> (log10) & Hydrogenase utilizers (log10)              | 0.498503                                                                                  | 7.20534  | 0.000000 |
| <i>C. jejuni</i> (log10) & <i>L. salivarius</i> (log10)               | 0.034213                                                                                  | 0.42894  | 0.668552 |
| <i>C. jejuni</i> (log10) & <i>C. jejuni</i> (log10)                   |                                                                                           |          |          |
