# Supplementary material for: Microorganisms Involved in Hydrogen Sink in the Gastrointestinal Tract of Chickens
Source: MDPI journal article supplement (doi:10.3390/ijms24076674), 2023-04-03
Supplement: s1 [file s1]

| Pair of variables                                                     | Source=commercial group<br>The Spearman rho's rank<br>correlation results; $p < 0.05000$ |          |          |
|-----------------------------------------------------------------------|------------------------------------------------------------------------------------------|----------|----------|
|                                                                       | $R_s$<br>Spearman                                                                        | t(N-2)   | $p$      |
| Methanogenic archaea (log10) & Methanogenic archaea (log10)           |                                                                                          |          |          |
| Methanogenic archaea (log10) & Acetogens (log10)                      | 0.641109                                                                                 | 6.02398  | 0.000000 |
| Methanogenic archaea (log10) & Sulfate-reducing bacteria (log10)      | 0.225229                                                                                 | 1.66698  | 0.101531 |
| Methanogenic archaea (log10) & Hydrogenase utilizers (log10)          | 0.248798                                                                                 | 1.85235  | 0.069655 |
| Methanogenic archaea (log10) & <i>L. salivarius</i> (log10)           | 0.225620                                                                                 | 1.67003  | 0.100924 |
| Methanogenic archaea (log10) & <i>C. jejuni</i> (log10)               | 0.227463                                                                                 | 1.68441  | 0.098096 |
| Acetogens (log10) & Methanogenic archaea (log10)                      | 0.641109                                                                                 | 6.02398  | 0.000000 |
| Acetogens (log10) & Acetogens (log10)                                 |                                                                                          |          |          |
| Acetogens (log10) & Sulfate-reducing bacteria (log10)                 | 0.357692                                                                                 | 2.76210  | 0.007920 |
| Acetogens (log10) & Hydrogenase utilizers (log10)                     | 0.164740                                                                                 | 1.20441  | 0.233885 |
| Acetogens (log10) & <i>L. salivarius</i> (log10)                      | 0.275188                                                                                 | 2.06410  | 0.044014 |
| Acetogens (log10) & <i>C. jejuni</i> (log10)                          | 0.200609                                                                                 | 1.47663  | 0.145806 |
| Sulfate-reducing bacteria (log10) & Methanogenic archaea (log10)      | 0.225229                                                                                 | 1.66698  | 0.101531 |
| Sulfate-reducing bacteria (log10) & Acetogens (log10)                 | 0.357692                                                                                 | 2.76210  | 0.007920 |
| Sulfate-reducing bacteria (log10) & Sulfate-reducing bacteria (log10) |                                                                                          |          |          |
| Sulfate-reducing bacteria (log10) & Hydrogenase utilizers (log10)     | 0.138590                                                                                 | 1.00912  | 0.317588 |
| Sulfate-reducing bacteria (log10) & <i>L. salivarius</i> (log10)      | 0.210560                                                                                 | 1.55319  | 0.126443 |
| Sulfate-reducing bacteria (log10) & <i>C. jejuni</i> (log10)          | 0.144732                                                                                 | 1.05478  | 0.296401 |
| Hydrogenase utilizers (log10) & Methanogenic archaea (log10)          | 0.248798                                                                                 | 1.85235  | 0.069655 |
| Hydrogenase utilizers (log10) & Acetogens (log10)                     | 0.164740                                                                                 | 1.20441  | 0.233885 |
| Hydrogenase utilizers (log10) & Sulfate-reducing bacteria (log10)     | 0.138590                                                                                 | 1.00912  | 0.317588 |
| Hydrogenase utilizers (log10) & Hydrogenase utilizers (log10)         |                                                                                          |          |          |
| Hydrogenase utilizers (log10) & <i>L. salivarius</i> (log10)          | -0.123593                                                                                | -0.89813 | 0.373257 |
| Hydrogenase utilizers (log10) & <i>C. jejuni</i> (log10)              | 0.259824                                                                                 | 1.94026  | 0.057780 |
| <i>L. salivarius</i> (log10) & Methanogenic archaea (log10)           | 0.225620                                                                                 | 1.67003  | 0.100924 |
| <i>L. salivarius</i> (log10) & Acetogens (log10)                      | 0.275188                                                                                 | 2.06410  | 0.044014 |
| <i>L. salivarius</i> (log10) & Sulfate-reducing bacteria (log10)      | 0.210560                                                                                 | 1.55319  | 0.126443 |
| <i>L. salivarius</i> (log10) & Hydrogenase utilizers (log10)          | -0.123593                                                                                | -0.89813 | 0.373257 |
| <i>L. salivarius</i> (log10) & <i>L. salivarius</i> (log10)           |                                                                                          |          |          |
| <i>L. salivarius</i> (log10) & <i>C. jejuni</i> (log10)               | -0.336411                                                                                | -2.57604 | 0.012874 |
| <i>C. jejuni</i> (log10) & Methanogenic archaea (log10)               | 0.227463                                                                                 | 1.68441  | 0.098096 |
| <i>C. jejuni</i> (log10) & Acetogens (log10)                          | 0.200609                                                                                 | 1.47663  | 0.145806 |
| <i>C. jejuni</i> (log10) & Sulfate-reducing bacteria (log10)          | 0.144732                                                                                 | 1.05478  | 0.296401 |
| <i>C. jejuni</i> (log10) & Hydrogenase utilizers (log10)              | 0.259824                                                                                 | 1.94026  | 0.057780 |
| <i>C. jejuni</i> (log10) & <i>L. salivarius</i> (log10)               | -0.336411                                                                                | -2.57604 | 0.012874 |
| <i>C. jejuni</i> (log10) & <i>C. jejuni</i> (log10)                   |                                                                                          |          |          |
