# Supplementary material for: Microorganisms Involved in Hydrogen Sink in the Gastrointestinal Tract of Chickens
Source: MDPI journal article supplement (doi:10.3390/ijms24076674), 2023-04-03
Supplement: s1 [file s1]

| Pair of variables                                                     | Source=free-range group<br>The Spearman rho's rank correlation results; $p < 0.05000$ |           |          |
|-----------------------------------------------------------------------|---------------------------------------------------------------------------------------|-----------|----------|
|                                                                       | $R_s$<br>Spearman                                                                     | t(N-2)    | $p$      |
| Methanogenic archaea (log10) & Methanogenic archaea (log10)           |                                                                                       |           |          |
| Methanogenic archaea (log10) & Acetogens (log10)                      | 0.383513                                                                              | 2.906866  | 0.005469 |
| Methanogenic archaea (log10) & Sulfate-reducing bacteria (log10)      | 0.252893                                                                              | 1.829727  | 0.073378 |
| Methanogenic archaea (log10) & Hydrogenase utilizers (log10)          | 0.099262                                                                              | 0.698284  | 0.488300 |
| Methanogenic archaea (log10) & <i>L. salivarius</i> (log10)           | -0.042357                                                                             | -0.296764 | 0.767901 |
| Methanogenic archaea (log10) & <i>C. jejuni</i> (log10)               | 0.039408                                                                              | 0.276069  | 0.783656 |
| Acetogens (log10) & Methanogenic archaea (log10)                      | 0.383513                                                                              | 2.906866  | 0.005469 |
| Acetogens (log10) & Acetogens (log10)                                 |                                                                                       |           |          |
| Acetogens (log10) & Sulfate-reducing bacteria (log10)                 | 0.449429                                                                              | 3.521714  | 0.000938 |
| Acetogens (log10) & Hydrogenase utilizers (log10)                     | 0.185395                                                                              | 1.320662  | 0.192749 |
| Acetogens (log10) & <i>L. salivarius</i> (log10)                      | 0.003980                                                                              | 0.027858  | 0.977889 |
| Acetogens (log10) & <i>C. jejuni</i> (log10)                          | 0.201828                                                                              | 1.442481  | 0.155529 |
| Sulfate-reducing bacteria (log10) & Methanogenic archaea (log10)      | 0.252893                                                                              | 1.829727  | 0.073378 |
| Sulfate-reducing bacteria (log10) & Acetogens (log10)                 | 0.449429                                                                              | 3.521714  | 0.000938 |
| Sulfate-reducing bacteria (log10) & Sulfate-reducing bacteria (log10) |                                                                                       |           |          |
| Sulfate-reducing bacteria (log10) & Hydrogenase utilizers (log10)     | 0.414109                                                                              | 3.184663  | 0.002520 |
| Sulfate-reducing bacteria (log10) & <i>L. salivarius</i> (log10)      | 0.068154                                                                              | 0.478187  | 0.634644 |
| Sulfate-reducing bacteria (log10) & <i>C. jejuni</i> (log10)          | 0.390982                                                                              | 2.973573  | 0.004556 |
| Hydrogenase utilizers (log10) & Methanogenic archaea (log10)          | 0.099262                                                                              | 0.698284  | 0.488300 |
| Hydrogenase utilizers (log10) & Acetogens (log10)                     | 0.185395                                                                              | 1.320662  | 0.192749 |
| Hydrogenase utilizers (log10) & Sulfate-reducing bacteria (log10)     | 0.414109                                                                              | 3.184663  | 0.002520 |
| Hydrogenase utilizers (log10) & Hydrogenase utilizers (log10)         |                                                                                       |           |          |
| Hydrogenase utilizers (log10) & <i>L. salivarius</i> (log10)          | 0.570129                                                                              | 4.857742  | 0.000013 |
| Hydrogenase utilizers (log10) & <i>C. jejuni</i> (log10)              | 0.760057                                                                              | 8.187047  | 0.000000 |
| <i>L. salivarius</i> (log10) & Methanogenic archaea (log10)           | -0.042357                                                                             | -0.296764 | 0.767901 |
| <i>L. salivarius</i> (log10) & Acetogens (log10)                      | 0.003980                                                                              | 0.027858  | 0.977889 |
| <i>L. salivarius</i> (log10) & Sulfate-reducing bacteria (log10)      | 0.068154                                                                              | 0.478187  | 0.634644 |
| <i>L. salivarius</i> (log10) & Hydrogenase utilizers (log10)          | 0.570129                                                                              | 4.857742  | 0.000013 |
| <i>L. salivarius</i> (log10) & <i>L. salivarius</i> (log10)           |                                                                                       |           |          |
| <i>L. salivarius</i> (log10) & <i>C. jejuni</i> (log10)               | 0.305739                                                                              | 2.247810  | 0.029122 |
| <i>C. jejuni</i> (log10) & Methanogenic archaea (log10)               | 0.039408                                                                              | 0.276069  | 0.783656 |
| <i>C. jejuni</i> (log10) & Acetogens (log10)                          | 0.201828                                                                              | 1.442481  | 0.155529 |
| <i>C. jejuni</i> (log10) & Sulfate-reducing bacteria (log10)          | 0.390982                                                                              | 2.973573  | 0.004556 |
| <i>C. jejuni</i> (log10) & Hydrogenase utilizers (log10)              | 0.760057                                                                              | 8.187047  | 0.000000 |
| <i>C. jejuni</i> (log10) & <i>L. salivarius</i> (log10)               | 0.305739                                                                              | 2.247810  | 0.029122 |
| <i>C. jejuni</i> (log10) & <i>C. jejuni</i> (log10)                   |                                                                                       |           |          |
